# Supplementary material for: Transcriptome Analysis Reveals a Diverse Range of Novel Viruses in Australian Sugarcane Soldier Fly (Inopus flavus) Larvae
Source: MDPI journal article supplement (doi:10.3390/v16040516), 2024-03-27
Supplement: s1 [file s1]

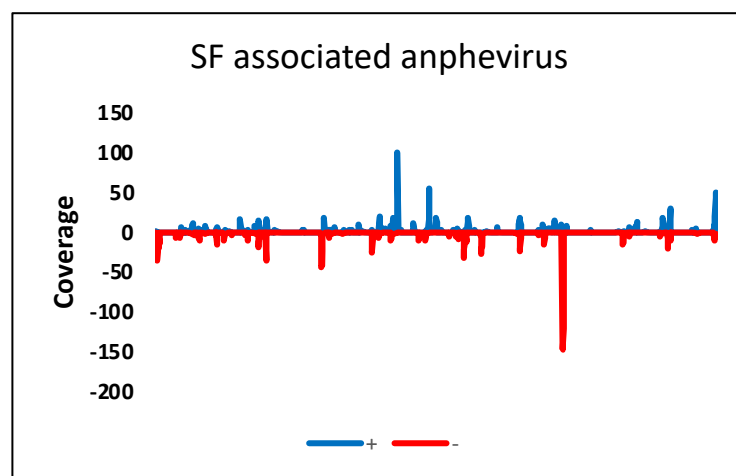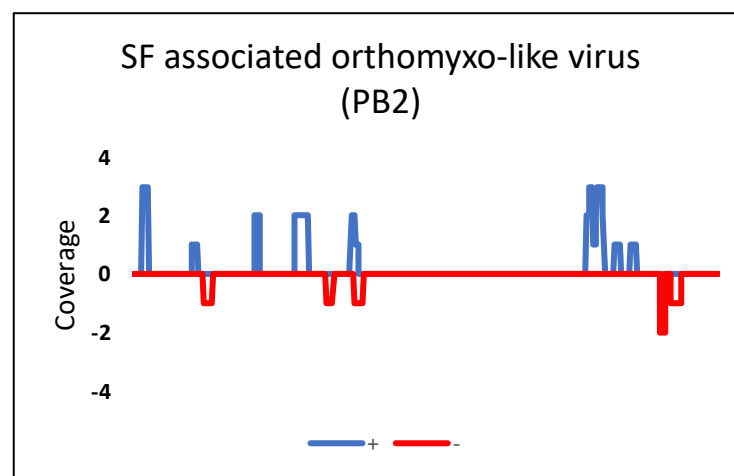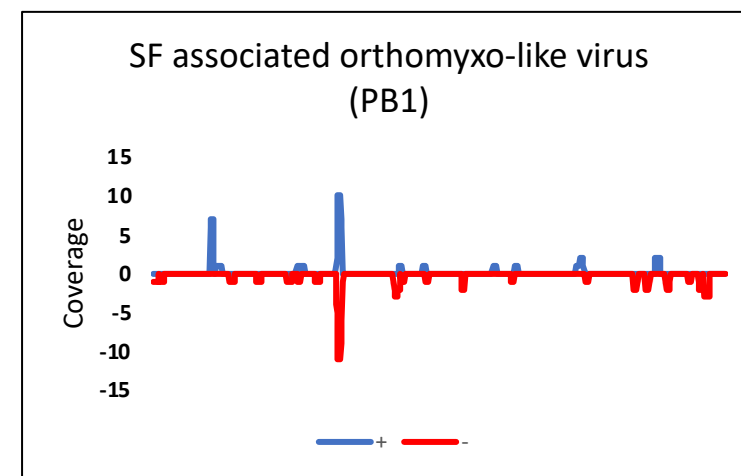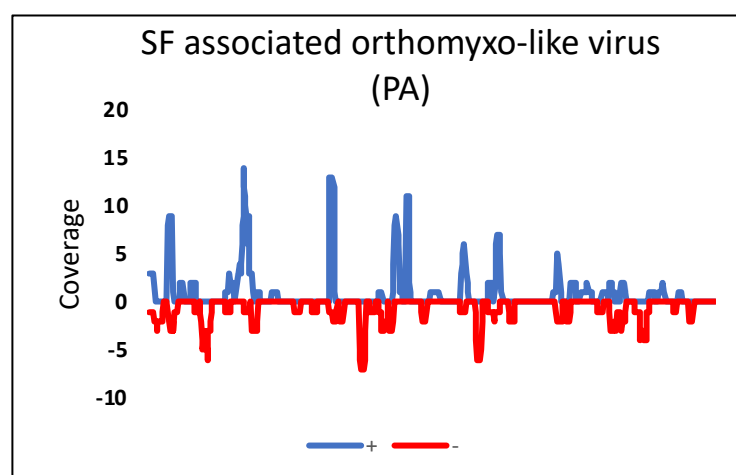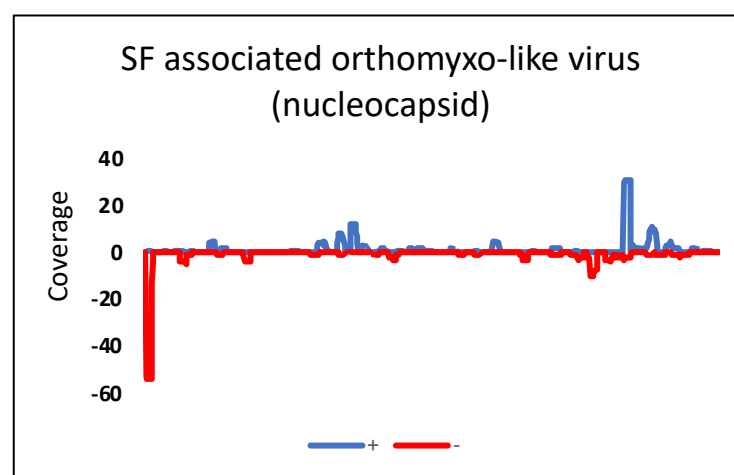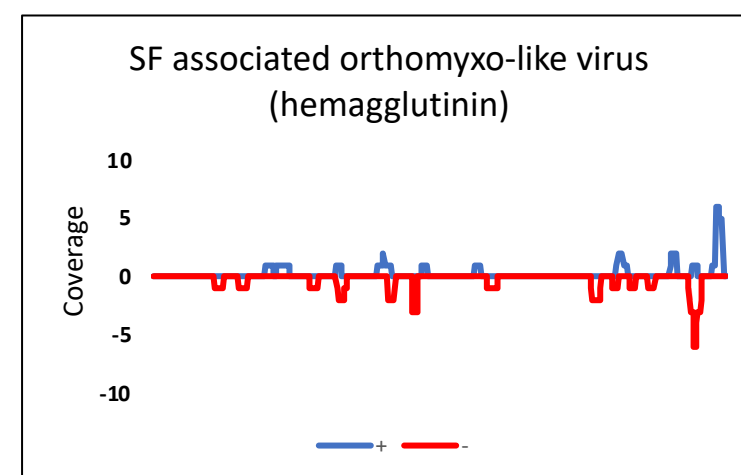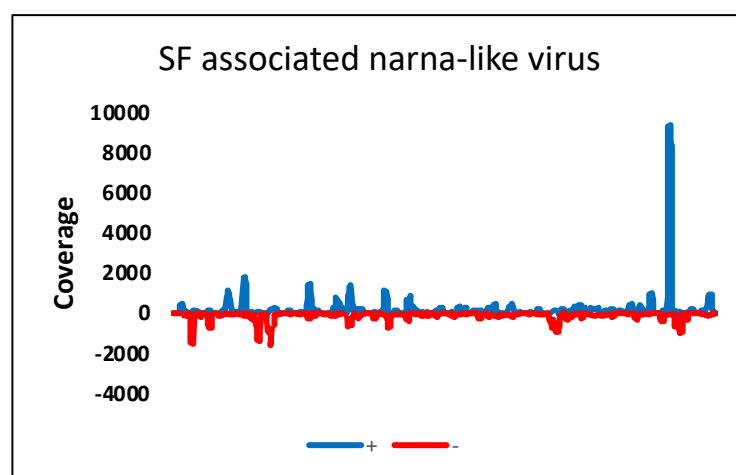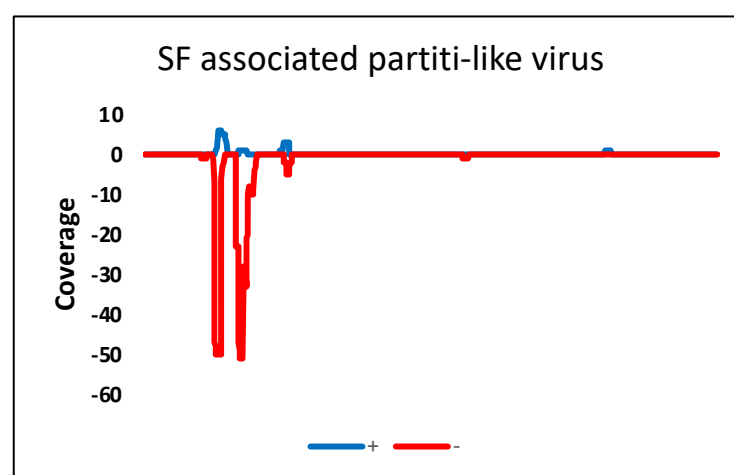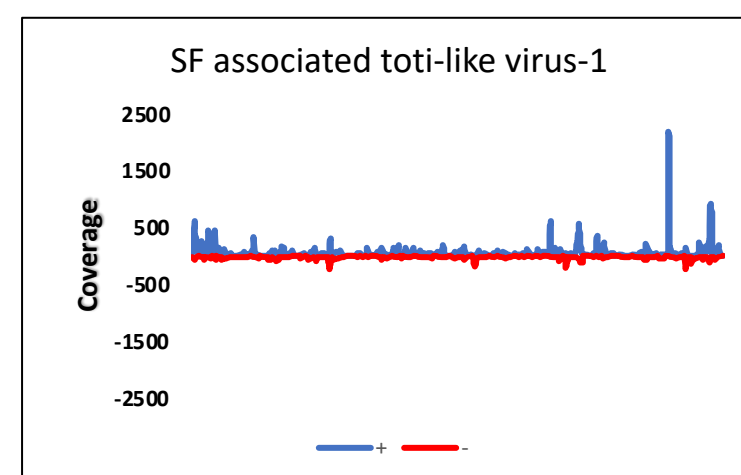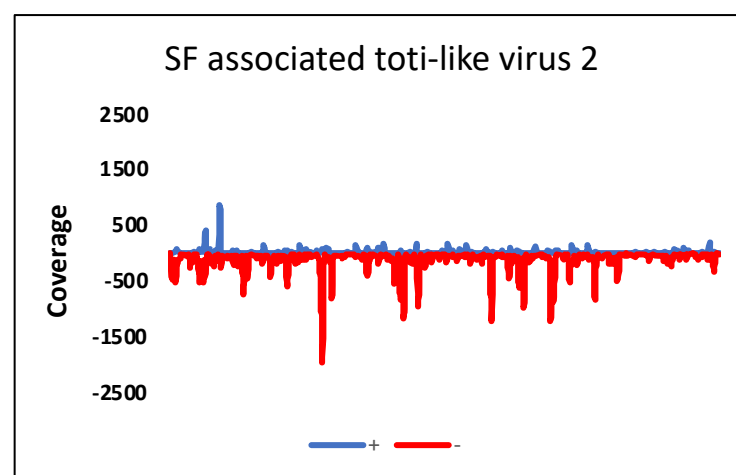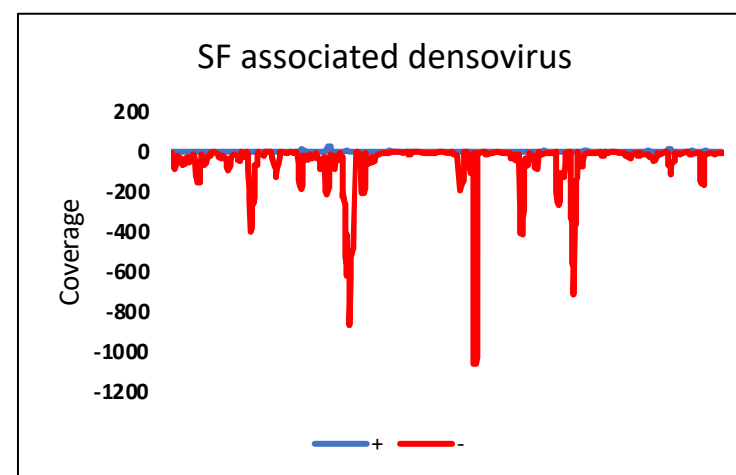

The distribution of 21nt-long viral-derived sRNA mapped back to the virus positive (Blue) and negative (Red) sense nucleotide sequences
